# Supplementary material for: Timing and Predictors of Loss of Infectivity Among Healthcare Workers With Mild Primary and Recurrent COVID-19: A Prospective Observational Cohort Study
Source: PubMed Central journal article supplement (PMC10954326; doi:10.1093/cid/ciad535), 2023-09-07
Supplement: ciad535_supplementary_data.pdf [file ciad535_supplementary_data.pdf]

## Supplemental Online Content

Dzieciolowska S, Charest H, Roy T et al. Timing and Predictors of Loss of Infectivity among Healthcare Workers with Mild Primary and Recurrent COVID-19: a Prospective Observational Cohort Study

**eMethods.** Whole Genome Sequencing

**eTable 1.** Association between symptomatology and infectivity on day 5, 7 and 10 of COVID-19 among healthcare workers (bivariate analyses)

**eFIGURE 1.** Performance of return-to-work criteria for healthcare workers with recurrent COVID-19 on the fifth day of their infection

This supplemental material has been provided by the authors to give readers additional information about their work.

## eMethods

### Whole Genome Sequencing and Sequence Data Analysis

Nucleic acids were extracted from 0.2-mL aliquots using the NUCLISENS easyMAG (bioMérieux, Marcy-l'Étoile, France). The viral RNA was sequenced using Illumina technology, and a targeted SARS-CoV-2 amplification strategy was employed based on the ARTIC V4.1 primer scheme.<sup>1</sup> Libraries were prepared with the Illumina COVIDSeq Test kit according to manufacturer's recommendation<sup>2</sup> and sequenced with a NextSeq 1000 (Illumina). Data analysis was conducted using the GenPipes Covseq pipeline,<sup>3</sup> which performed alignment and produced variant calls. Initially, host reads were removed by aligning them to a hybrid reference consisting of human (GRCh38) and Wuhan-Hu-1 SARS-CoV-2 reference (MN908947.3) sequences. Raw reads were trimmed using cutadapt (v2.10), and then aligned to the reference using bwa-mem (v0.7.17).<sup>4</sup> The resulting aligned reads were filtered using sambamba (v0.7.0),<sup>5</sup> which removed paired reads with insert sizes outside the 60-300 bp range, unmapped reads, and all secondary alignments. Remaining ARTIC primers (v4.1) were trimmed using iVar (v1.3).<sup>6</sup> To generate a consensus sequence, a pileup was produced using Samtools (v1.12),<sup>7</sup> which was then used as input for FreeBayes (v1.3.4) to create a consensus sequence for regions with a minimum of 10× depth and using reads with a Q score > 20.<sup>8</sup> Mutations were annotated with snpEff (v4.5).<sup>9</sup> Single nucleotide variants below 5% allele frequency were filtered out. A full description of the process can be found here:

[https://c3g.github.io/covseq\\_McGill/SARS\\_CoV2\\_Sequencing/Illumina\\_overview.html](https://c3g.github.io/covseq_McGill/SARS_CoV2_Sequencing/Illumina_overview.html).

### Variant identification and detection of recombination

Variant identification was performed using the Pangolin program (v4.2, UShER analysis mode),<sup>10</sup> and the program nCoV-recombinant (v.0.6.0) was used to characterize recombinant lineages non-identified by Pangolin.<sup>11</sup>

## eMethods References

1. Initial implementation of an ARTIC bioinformatics platform for nanopore sequencing of nCoV2019 novel coronavirus. <https://github.com/artic-network/artic-ncov2019>, Accessed March 14, 2023.
2. Illumina COVIDSeq Test Instructions for Use. <https://support.illumina.com/downloads/illumina-covidseq-test-instructions-for-use-1000000128490.html>. Accessed March 14, 2023.
3. CoV Sequencing Pipeline. [https://genpipes.readthedocs.io/en/genpipes-v4.1.2/user\\_guide/pipelines/gp\\_covseq.html](https://genpipes.readthedocs.io/en/genpipes-v4.1.2/user_guide/pipelines/gp_covseq.html), 2019.
4. Li H, Durbin R. Fast and accurate short read alignment with Burrows-Wheeler transform. *Bioinformatics*. Jul 15 2009;25(14):1754-60. doi:10.1093/bioinformatics/btp324
5. Tarasov A, Vilella AJ, Cuppen E, Nijman IJ, Prins P. Sambamba: fast processing of NGS alignment formats. *Bioinformatics*. Jun 15 2015;31(12):2032-4. doi:10.1093/bioinformatics/btv098
6. Castellano S, Cestari F, Faglioni G, et al. iVar, an Interpretation-Oriented Tool to Manage the Update and Revision of Variant Annotation and Classification. *Genes (Basel)*. Mar 8 2021;12(3)doi:10.3390/genes12030384
7. Li H, Handsaker B, Wysoker A, et al. The Sequence Alignment/Map format and SAMtools. *Bioinformatics*. Aug 15 2009;25(16):2078-9. doi:10.1093/bioinformatics/btp352
8. Garrison E, Marth G. Haplotype-based variant detection from short-read sequencing. *arXiv preprint arXiv:12073907*. 2012;
9. Cingolani P, Platts A, Wang le L, et al. A program for annotating and predicting the effects of single nucleotide polymorphisms, SnpEff: SNPs in the genome of *Drosophila melanogaster* strain w1118; iso-2; iso-3. *Fly (Austin)*. Apr-Jun 2012;6(2):80-92. doi:10.4161/fly.19695
10. O'Toole A, Scher E, Underwood A, et al. Assignment of epidemiological lineages in an emerging pandemic using the pangolin tool. *Virus Evol*. 2021;7(2):veab064. doi:10.1093/ve/veab064
11. ktmeaton/ncov-recombinant. <https://github.com/ktmeaton/ncov-recombinant>, 2023.

**eTable 1.** Association between symptomatology and infectivity on day 5, 7 and 10 of COVID-19 among healthcare workers (bivariate analyses)

| Explanatory variable         | Day 5                  |                         |                  |                      | Day 7                  |                         |                   |                      | Day 10                 |                         |                   |                      |
|------------------------------|------------------------|-------------------------|------------------|----------------------|------------------------|-------------------------|-------------------|----------------------|------------------------|-------------------------|-------------------|----------------------|
|                              | Absence of infectivity | Presence of infectivity | OR (95% CI)      | P-value <sup>a</sup> | Absence of infectivity | Presence of infectivity | OR (95% CI)       | P-value <sup>a</sup> | Absence of infectivity | Presence of infectivity | OR (95% CI)       | P-value <sup>a</sup> |
|                              | n (line %)             | n (line %)              |                  |                      | n (line %)             | n (line %)              |                   |                      | n (line %)             | n (line %)              |                   |                      |
| <b>Symptoms</b>              |                        |                         |                  |                      |                        |                         |                   |                      |                        |                         |                   |                      |
| Chills                       | 1 (6.7)                | 14 (93.3)               | 6.51 (0.8251-59) | 0.08                 | 2 (28.6)               | 5 (71.4)                | 3.00 (0.56-16.13) | 0.20                 | 3 (75.0)               | 1 (25.0)                | 1.65 (0.16-16.72) | 0.67                 |
| Cough                        | 20 (25.3)              | 59 (74.7)               | 1.58 (0.70-3.62) | 0.27                 | 31 (46.3)              | 36 (53.7)               | 1.89 (0.90-4.00)  | 0.09                 | 41 (75.9)              | 13 (24.1)               | 2.54 (0.93-6.92)  | 0.07                 |
| Fatigue                      | 12 (20.3)              | 47 (79.7)               | 2.27 (1.00-5.16) | 0.051                | 22 (50.0)              | 22 (50.0)               | 1.21 (0.57-2.56)  | 0.62                 | 27 (75.0)              | 9 (25.0)                | 2.12 (0.79-5.69)  | 0.14                 |
| Myalgia                      | 7 (21.2)               | 26 (78.8)               | 1.70 (0.66-4.40) | 0.27                 | 6 (33.3)               | 12 (66.7)               | 2.60 (0.90-7.50)  | 0.08                 | 9 (81.8)               | 2 (18.2)                | 1.09 (0.22-5.46)  | 0.92                 |
| Sore throat                  | 9 (18.8)               | 39 (81.3)               | 2.36 (0.98-5.64) | 0.06                 | 16 (50.0)              | 16 (50.0)               | 1.18 (0.52-2.66)  | 0.69                 | 18 (94.7)              | 1 (5.3)                 | 0.23 (0.03-1.84)  | 0.17                 |
| Headache                     | 10 (22.7)              | 34 (77.3)               | 1.60 (0.68-3.77) | 0.28                 | 10 (38.5)              | 16 (61.5)               | 2.13 (0.87-5.21)  | 0.10                 | 14 (87.5)              | 2 (12.5)                | 0.66 (0.14-3.16)  | 0.60                 |
| Dizziness                    | 4 (33.3)               | 8 (66.7)                | 0.78 (0.22-2.78) | 0.70                 | 5 (33.3)               | 10 (66.7)               | 2.53 (0.81-7.94)  | 0.11                 | 10 (90.9)              | 1 (9.1)                 | 0.46 (0.06-3.79)  | 0.47                 |
| Rhinorrhea and/or congestion | 19 (23.2)              | 63 (76.8)               | 2.26 (0.98-5.20) | 0.055                | 31 (47.7)              | 34 (52.3)               | 1.16 (0.77-3.38)  | 0.20                 | 36 (76.6)              | 11 (23.4)               | 2.07 (0.78-5.48)  | 0.14                 |
| Diarrhea                     | 4 (25.0)               | 12 (75.0)               | 1.23 (0.37-4.13) | 0.73                 | 4 (36.4)               | 7 (63.6)                | 2.11 (0.58-7.66)  | 0.25                 | 2 (50.0)               | 2 (50.0)                | 5.28 (0.70-39.93) | 0.11                 |
| Loss of appetite             | 8 (28.6)               | 20 (71.4)               | 1.00 (0.39-2.55) | 1.00                 | 7 (33.3)               | 14 (66.7)               | 2.68 (0.99-7.24)  | 0.052                | 11 (68.8)              | 5 (31.3)                | 2.61 (0.79-8.57)  | 0.12                 |

Footnote : <sup>a</sup> Proportions were compared using chi-square or fisher exact test when appropriate

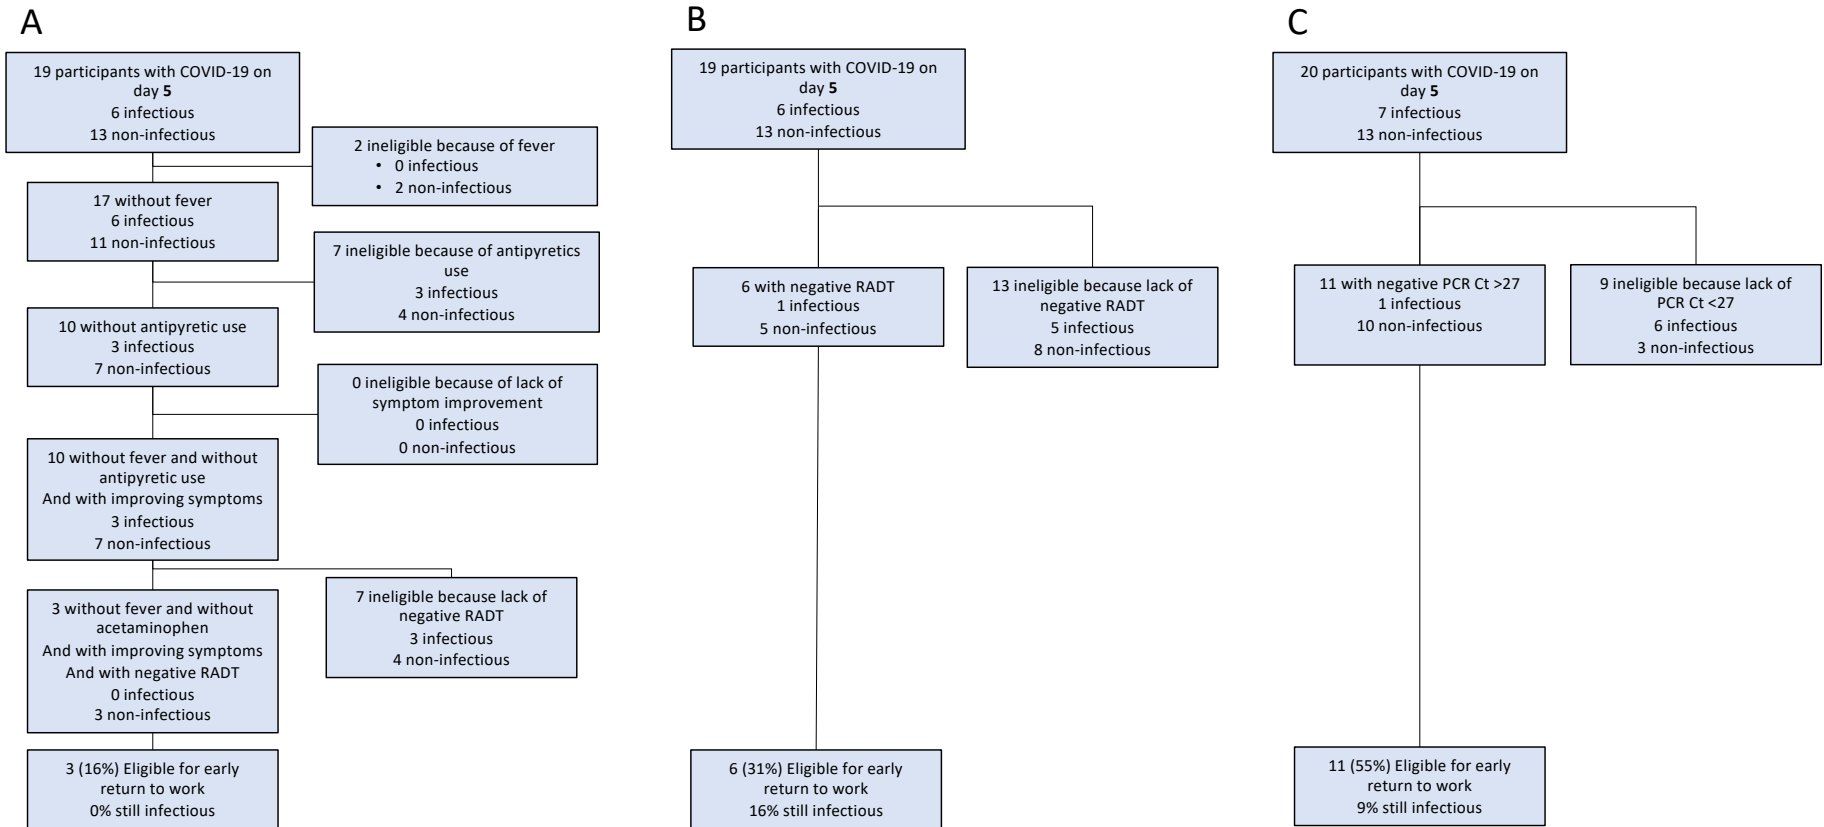

**eFIGURE 1. Performance of return-to-work criteria for healthcare workers with recurrent COVID-19 on the fifth day of their infection. Panel A** shows the performance of the Centers for Diseases Control and Prevention (US CDC) Return to Work criteria. **Panels B and C** shows the performance of alternate algorithms relying on rapid antigen detection tests (RADT) and RT-PCR cycle threshold (Ct) values.
